# Supplementary material
Source: publisher figshare collection journal article supplement (https://acs.figshare.com/ndownloader/files/12788687)
Supplement: Supplementary file 1 [file 12788687]

## Supporting Information

### Nanocellulose Structured Paper-based Lithium Metal Batteries

Zhaohui Wang,<sup>‡,\*a</sup> Ruijun Pan,<sup>‡a</sup> Rui Sun,<sup>b</sup> Kristina Edström,<sup>a</sup> Maria Strømme,<sup>b</sup> Leif Nyholm<sup>a\*</sup>

<sup>a</sup> Department of Chemistry-Ångström, The Ångström Laboratory, Uppsala University, Box 538, SE-751 21 Uppsala, Sweden.

Email: [Zhaohui.Wang@kemi.uu.se](mailto:Zhaohui.Wang@kemi.uu.se); [Leif.Nyholm@kemi.uu.se](mailto:Leif.Nyholm@kemi.uu.se)

<sup>b</sup> Nanotechnology and Functional Materials, Department of Engineering Sciences, The Ångström Laboratory, Uppsala University, Box 534, SE-751 21 Uppsala, Sweden

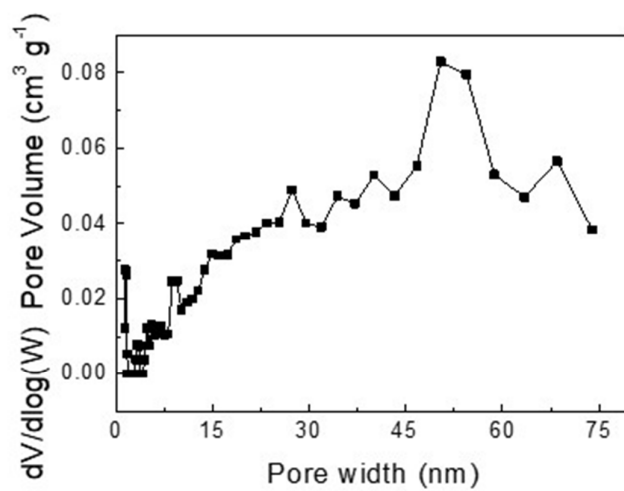

**Figure S1.** The pore size distribution for the CCP electrode.

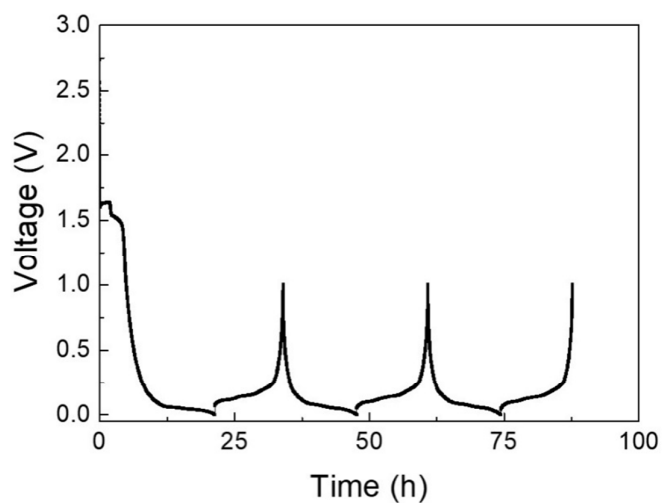

**Figure S2.** The cycling curves corresponding to the three-cycle pretreatment of the Li-CCP cell. This process involved a cycling of the cell at a current density of  $0.125 \text{ mA cm}^{-2}$  in a voltage window between 0.01 and 1.0 V (vs.  $\text{Li}^+/\text{Li}$ ).

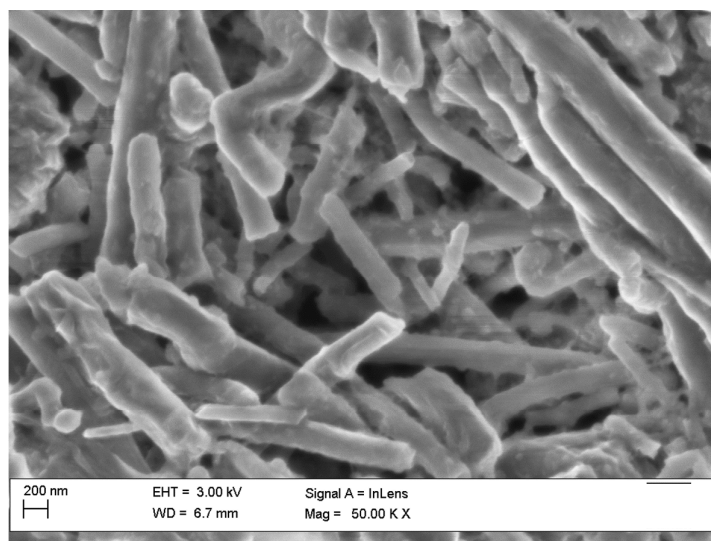

**Figure S3.** High resolution cross-section SEM image of the CCP electrode obtained after deposition of  $8 \text{ mAh cm}^{-2}$  Li.

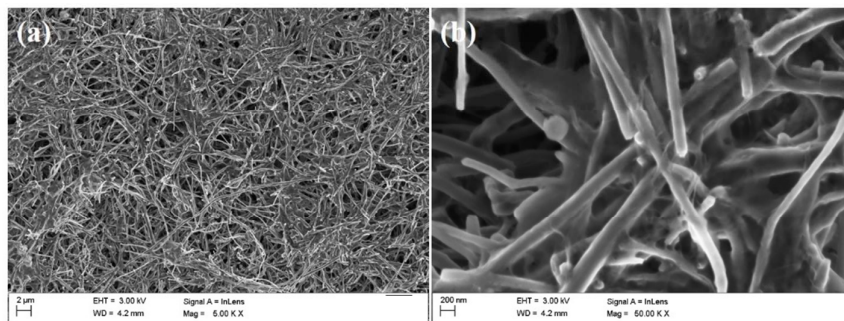

**Figure S4.** SEM images of the CCP electrode obtained after oxidizing the previously deposited Li coating, (a) low magnification image, (b), high magnification image.

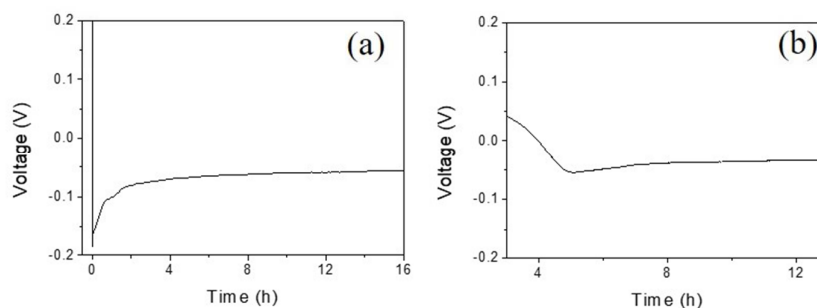

**Figure S5.** The potential as a function of the time during Li deposition on a (a) Cu and (b) CCP electrode versus the Li counter/reference electrode using a current density of  $0.5 \text{ mA cm}^{-2}$ . The shape of the chronopotentiogram for the Cu electrode indicates the presence of a nucleation overpotential whereas the positive potential seen initially for the CCP electrode may be explained by underpotential deposition as explained in the main text.

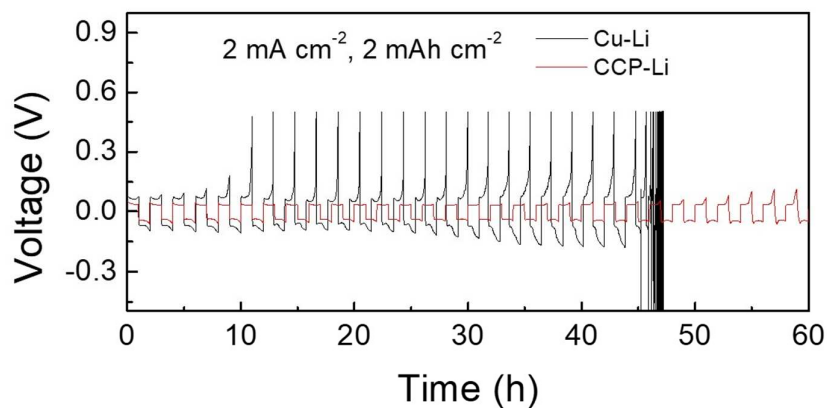

**Figure S6.** The cell voltage as a function of time for repeated Li metal deposition and oxidation using a fixed charge of  $2 \text{ mAh cm}^{-2}$  and a current density of  $2 \text{ mA cm}^{-2}$  for the Li-Cu|Li and Li-CCP|Li cells, respectively. For the Li-CCP or Li-Cu electrode, lithium metal was first pre-plated using a charge of  $6 \text{ mAh cm}^{-2}$  at a current density of  $0.5 \text{ mA cm}^{-2}$ .

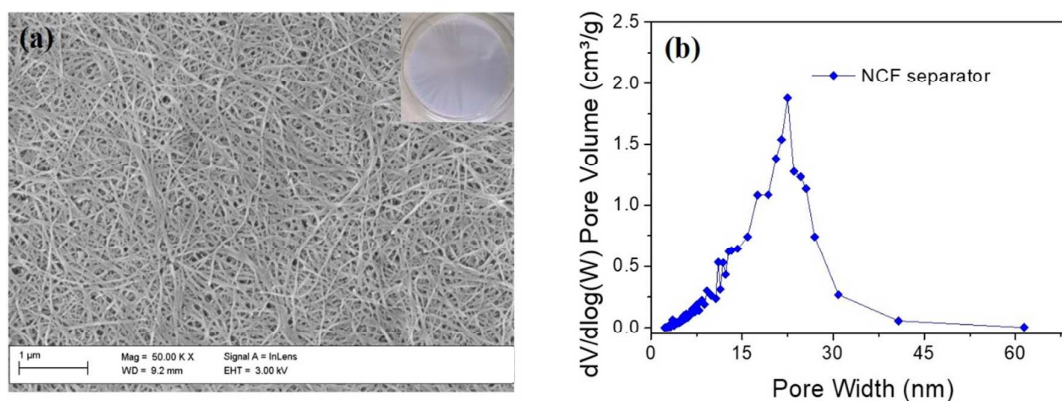

**Figure S7.** (a) SEM image of the NCF separator with a photo of the NCF separator as an inset. (b) The pore size distribution for the NCF separator.

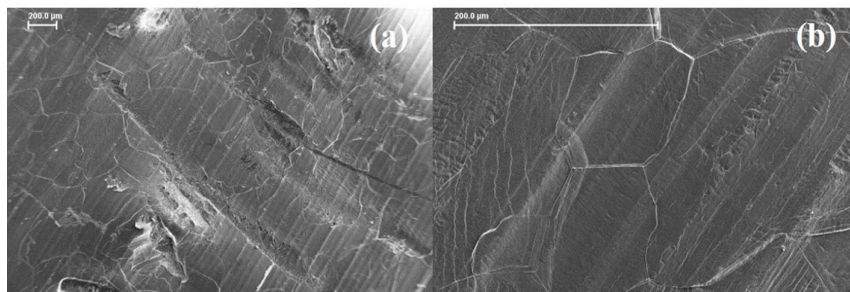

**Figure S8.** SEM images of the pristine Li metal foil. The image in a) was recorded with a lower degree of magnification than that used in the b) image.

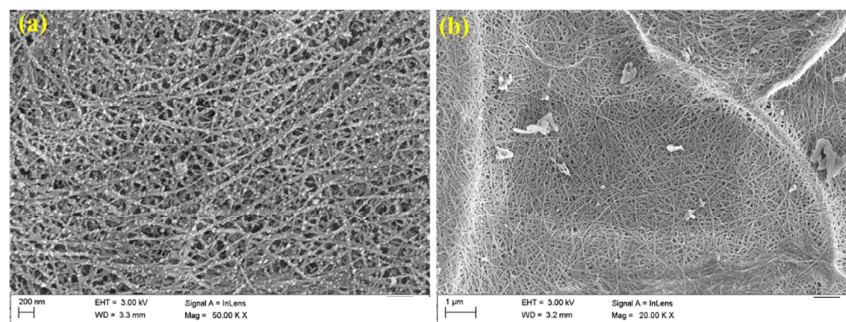

**Figure S9.** SEM images ((a) high magnification and (b) low magnification) depicting a NCF separator recovered from a NCF-based Li|Li cell after 300 cycles at  $0.5 \text{ mA cm}^{-2}$ ,  $1 \text{ mAh cm}^{-2}$  in a LP 40 electrolyte.

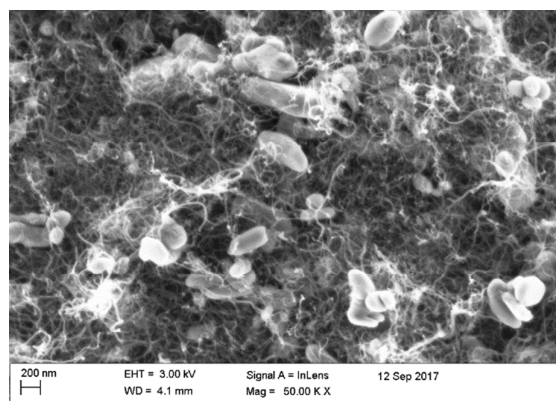

**Figure S10.** High resolution SEM image of LFP paper cathode.

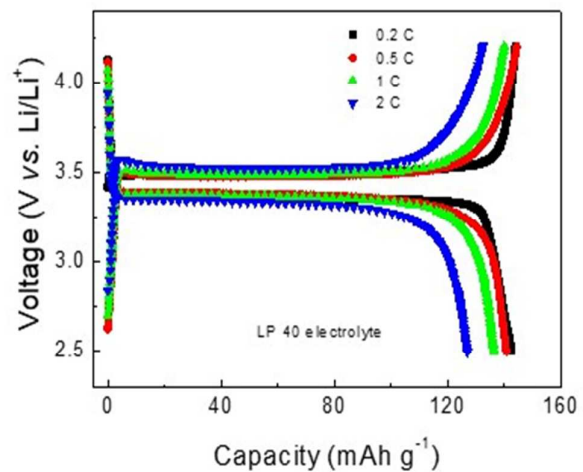

**Figure S11.** Galvanostatic voltage profiles recorded for different cycling rates using a Li/LFP cell containing a PE separator and a LP 40 electrolyte.

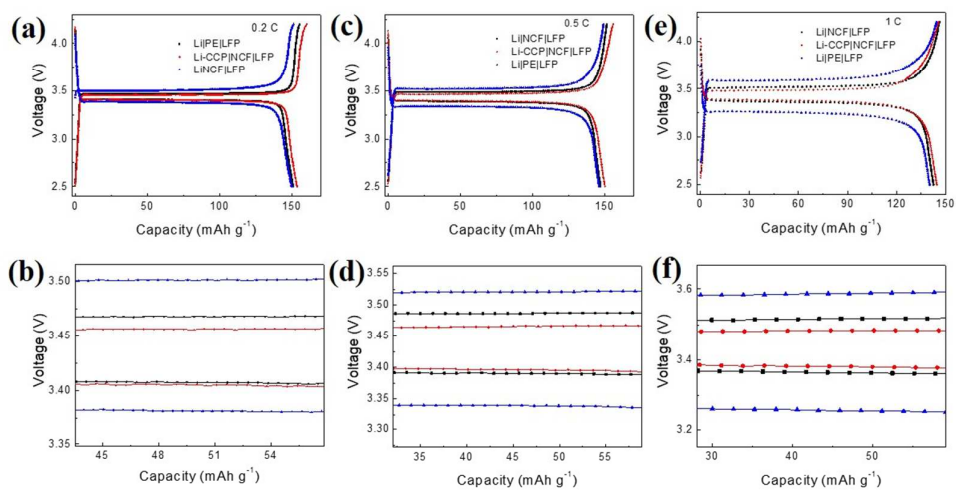

**Figure S12.** Galvanostatic voltage profiles for different full cells obtained at a rate of (a, b) 0.2 C, (c, d) 0.5 C and (e, f) 1 C, respectively. The differences between the charge and discharge voltages are more clearly seen in the (b, d and f) figures which show magnifications of the plateau regions for the different full cells.
